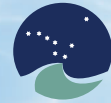

## Contribution to the Themed Section: 'Decommissioned offshore man-made installations' Original Article

# Benthic biodiversity on old platforms, young wind farms, and rocky reefs

Joop W. P. Coolen<sup>1,2,\*</sup>, Babeth van der Weide<sup>1</sup>, Joël Cuperus<sup>3</sup>, Maxime Blomberg<sup>1</sup>,  
Godfried W. N. M. Van Moorsel<sup>4</sup>, Marco A. Faasse<sup>5</sup>, Oscar G. Bos<sup>1</sup>, Steven Degraer<sup>6</sup>, and  
Han J. Lindeboom<sup>2</sup>

<sup>1</sup>Wageningen Marine Research, PO Box 57, 1780 AB Den Helder, The Netherlands

<sup>2</sup>Chair Group Aquatic Ecology and Water Quality Management, Wageningen University, Droevendaalsesteeg 3a, 6708 PD Wageningen, The Netherlands

<sup>3</sup>Central Information Services Department, Ministry of Infrastructure and the Environment, Rijkswaterstaat, Zuiderwagplein 2, 8224 AD Lelystad, The Netherlands

<sup>4</sup>Ecosub, PO Box 126, 3940 AC Doorn, The Netherlands

<sup>5</sup>eCOAST Marine Research, DOK41, Voltaweg 11c, 4382 NG Vlissingen, The Netherlands

<sup>6</sup>Aquatic and Terrestrial Ecology Marine Ecology and Management Section, Royal Belgian Institute of Natural Sciences Operational Directorate Natural Environment, Gulledele 100, 1200 Brussels, Belgium

\*Corresponding author: tel: +31 6 13005630; e-mail: [joop.coolen@wur.nl](mailto:joop.coolen@wur.nl).

Coolen, J. W. P., van der Weide, B., Cuperus, J., Blomberg, M., Van Moorsel, G. W. N. M., Faasse, M. A., Bos, O. G., Degraer, S., and Lindeboom, H. J. Benthic biodiversity on old platforms, young wind farms, and rocky reefs. – ICES Journal of Marine Science, 77: 1250–1265.

Received 10 January 2018; revised 13 June 2018; accepted 13 June 2018.

The introduction of artificial hard substrates in an area dominated by a sandy seabed increases habitat available to epifaunal organisms. To investigate this, samples were taken on old offshore oil and gas platforms, and data were compared with data of a young wind farm and a natural reef. Depth, sampling date, abundance of *Mytilus edulis*, *Psammechinus miliaris*, *Metridium dianthus*, and the presence of Tubulariidae and substrate (rock or steel) all correlated with species richness. Multivariate analysis showed a large overlap in communities on steel and rock and between the wind farm and platforms. The community changed over a gradient from deep rocks to shallow steel substrate, but no strong community differentiation was observed. Deep steel was more similar to natural rocks than shallow steel. When an artificial reef is intended to be colonized by communities similar to those on a natural reef, its structure should resemble a natural reef as much as possible.

**Keywords:** Benthos, marine growth, platforms, reef, species richness, wind farm.

## Introduction

The introduction of artificial hard substrates in areas dominated by sandy seabeds increases habitat available to epifaunal organisms (Zintzen and Massin, 2010; Lengkeek *et al.*, 2013; De Mesel *et al.*, 2015). As a result of the increasing number of offshore energy devices in the North Sea, the amount of artificial hard substrate increases steadily (Krone *et al.*, 2013). The European Wind

Energy Association estimates that the North Sea will hold up to 62 GW of offshore wind energy installations in 2030 (EWEA, 2015). Assuming 5 MW turbines, this is the equivalent of 12 400 turbine foundations, all providing artificial hard substrates to epifaunal organisms.

Oil and gas companies have been installing platforms in the North Sea since the 1960s (Shepherd, 2015) and expanded into

the Dutch continental shelf (DCS) from the early 1970s onward (EBN, 2014). The oldest North Sea offshore wind farm was constructed in 2002 (Leonhard and Christensen, 2006). Compared with oil and gas, offshore wind is still a young industry. Most oil and gas platforms in the North Sea were constructed using steel jacket foundations, which structurally resemble offshore wind-turbine foundations, offering similar substrate to epifaunal organisms. It is therefore expected that offshore wind farms and oil and gas platforms house similar benthic communities when other environmental variables are constant. However, other variables often differ between locations. For example, epifaunal communities on offshore installations evolve over time with dominance changing among species (Whomersley and Picken, 2003). Furthermore, species richness may increase with installation age (van der Stap *et al.*, 2016).

In recent years the number of offshore wind farms in the North Sea increased strongly. At the same time, a large-scale removal of offshore oil and gas installations is expected over the coming years (Ahiaga-dagbui *et al.*, 2017). Many oil and gas platforms are reaching their financial or technical end-of-life and will be decommissioned (Royal Academy of Engineering, 2013). To prevent high removal costs, loss of fishing habitat and to maintain the artificial reef effect of structures, alternative uses for the foundations of these platforms are proposed (Day and Gusmita, 2016). These include so called rigs-to-reefs (RTR) schemes, in which foundations are to be left at sea as artificial reefs, either left-in-place, toppled over, or relocated (Picken and McIntyre, 1989; Macreadie *et al.*, 2012). Similar proposals (named renewables-to-reefs; RTR) may be expected once offshore wind farms reach their end-of-life (Fowler *et al.*, 2015; Smyth *et al.*, 2015). To evaluate the ecological potential of such alternatives, more insight is needed into the current state of the epifaunal communities present on the structures. Offshore reefs of natural origin in the Netherlands are primarily composed of rocky substrate (Coolen *et al.*, 2016). These natural reefs, including their epibenthic community, qualify for protection under the European Habitat Directive (European Commission, 1992). If artificial habitats hold similar communities, they could be considered as desirable as well. This insight could then be used in the evaluation of future RTR proposals or in impact assessments for new installations. To evaluate the added value, if any, of these structures to the North Sea ecosystem structure and functioning, the following questions should be answered: Which organisms have colonised these artificial structures? What characteristics of these structures influence their community composition? What are the habitat preferences of the species currently found on these structures? Are the communities found similar to those on natural reefs? What habitats are particularly suitable for non-native species?

Many variables may be important drivers of species' presence on reefs (Coolen *et al.*, 2016; Herbert *et al.*, 2017). Depth, for example, is widely known to influence the vertical distribution of species on artificial reefs: some species are present only on deeper reefs (Coolen *et al.*, 2016) and species richness varies with depth and age (van der Stap *et al.*, 2016). Structural differences between reefs also explain part of the variation in the associated community (Coolen *et al.*, 2015). Straight steel surfaces differ from rocky reefs with a more complex surface area including holes and small-scale variation in surface orientation. Therefore, it is hypothesized that species richness of benthic communities is higher on rock than on smooth steel surfaces.

Relations among species also influence species composition. Species with disproportionately large effects on their environment

by modifying the habitat and associated community are defined as keystone species (Paine, 1969). Mills *et al.* (1993) described several types of keystone species, including keystone predators and modifiers. Keystone predators forage on species that otherwise would become dominant, reducing their abundance, which may increase local species richness. Alternatively, keystone predators may consume prey in such numbers that species richness is negatively affected while the predator becomes dominant. Keystone modifiers affect the survival of many other species. Their presence therefore could impact species richness. Several species present on artificial reefs may fit these types defined by Mills *et al.* (1993). The sea urchin *Psammechinus miliaris* (Müller, 1771) could fulfil a role as keystone predator. In low numbers, such predators may increase local species richness by creating patchiness in the fauna cover, allowing new species to colonise the substrate (Menge and Sutherland, 1976). This behaviour has been observed on artificial structures in the North Sea as well (J.W.P. Coolen, G. van Moorsel, pers. obs.). The sea anemone *Metridium dianthus* (Ellis, 1768) is known to smother and thereby kill other species (Kaplan, 1984; Nelson and Craig, 2011). Coolen *et al.* (2015) noticed that samples dominated by *M. dianthus* held less species than samples without this sea anemone. Therefore, it is hypothesised that *M. dianthus* has a negative influence on species richness through space monopolization and predation of larvae, functioning as a keystone predator. However, *M. dianthus* could also be seen as a keystone modifier since it reduces substrate available to other species. Mussels *Mytilus edulis* increase habitat heterogeneity resulting in increased species richness (Drent and Dekker, 2013). This bivalve could therefore be considered a keystone habitat modifier. A similar effect has been shown from the hydroid *Tubularia indivisa* Linnaeus, 1758, which creates complex growth forms facilitating a large number of associated species (Zintzen *et al.*, 2007).

The effects of some of these variables have been evaluated to some extent in previous research (Zintzen *et al.*, 2007; Walker and Schlacher, 2014; Coolen *et al.*, 2015, 2016; van der Stap *et al.*, 2016). However, these assessments only included a small number of variables, e.g. distance to coast, age, and depth on platforms (van der Stap *et al.*, 2016) or orientation on concrete artificial reefs in southern Portugal (Moura *et al.*, 2008). Therefore, the work reported here aims to assess the combined effect of a larger set of variables. Using samples taken on old offshore oil and gas platforms (age 15–40 years), a young wind farm (5 years) and a natural reef on the DCS, the effect of depth, age, disturbance by marine growth removal, season, substrate type, and the presence/absence of potential keystone species on species richness and composition was investigated.

## Methods

### Study area

Samples were taken on natural and artificial reefs on the DCS in the North Sea. Most of the DCS seabed consists of fine mud and fine to coarse sand [European Biodiversity data centre (BDC), 2016], interrupted by isolated gravel beds including cobbles and boulders on the Cleaver Bank, Texel Rough, Dogger Bank, and Borkum Reef Grounds (BRG) (Duineveld *et al.* 1991; Van Moorsel 2003; EMODnet 2015; Coolen *et al.* 2016; Figure 1).

Many artificial structures are present on the DCS: approximately 10 000 wreck locations (Leewis *et al.*, 2000; Lettens, 2015), although only 1000 of these are known as large objects (probably

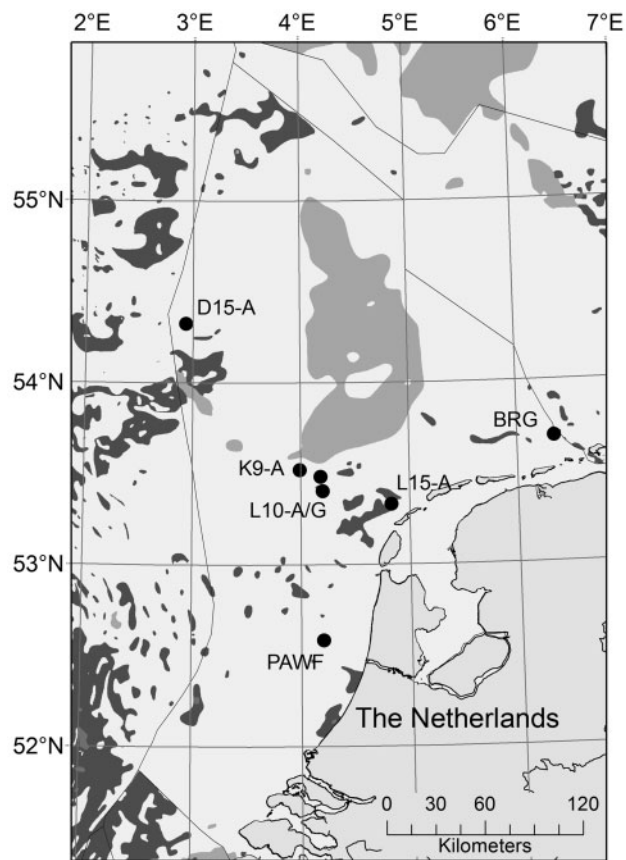

**Figure 1.** Habitat map of the DCS (black line). Dark: coarse sediment; medium: fine mud; light: sand. Habitat data based on EMODnet data using simplified EUNIS classes [EMODnet, 2015; European Biodiversity data centre (BDC), 2016]. With sample locations as black dots: BRG, Borkum Reef Grounds; PAWF, Princess Amalia Wind Farm, D15-A, K9-A, L10-A/G, and L15-A, oil and gas production platforms.

>10 m length; van der Weide 2008). Furthermore, 160 oil and gas production installations (Noordzeeloket, 2016), 289 wind turbine foundations (4C Offshore, 2016) and hundreds of buoys (Ministry of Infrastructure and Environment—Directorate-General Rijkswaterstaat, 2015) are present offshore on the DCS (Figure 2).

#### Platform data

Five oil and gas production platforms, operated by ENGIE Exploration & Production Nederland B.V. (ENGIE) were sampled between April 2014 and October 2015 (Figure 1, Table 1). The platforms were deployed in the period 1972–1999 and are supported by steel jacket foundations with cathodic protection with anodes. The seabed surrounding these installations is between 22 and 32 m deep and has been covered with cobbles and boulders (0.05–0.5 m), to prevent scouring of the sediment around the legs (rock dump, also known as scour protection). The area covered by rock dump varies between 500 and 8800 m<sup>2</sup> per platform, depending on local currents and pipelines present (G. Menijn, ENGIE, pers. comm.).

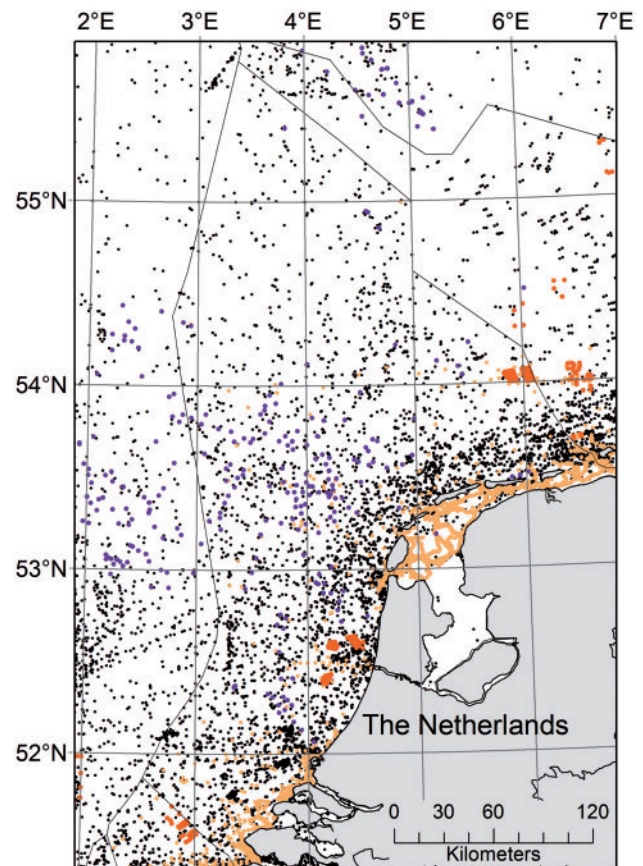

**Figure 2.** Shipwrecks (black dots), platforms (purple), wind farms (dark orange), buoys (light orange) present on DCS (outlined with black line).

#### Sampling methods

Platform samples were taken during regular inspection, repair, and maintenance (IRM) activities of the operator by a diver using a surface-supplied airlift sampler (Coolen et al., 2015) constructed of 50 and 75 mm standard PVC pipes. A 0.05 m<sup>2</sup> metal frame was attached to the structure using magnets and all fauna within the frame was scraped off using a putty knife. Removed fauna was then sucked up by the airlift sampler and collected in a net with a 0.5 mm mesh size. In between sampling, nets were replaced and sealed with a PVC screw lid. Three replicate samples were taken at 5 m depth intervals. At two locations, cobbles present on the seabed around the installation were collected by hand from a 0.05 m<sup>2</sup> metal frame and placed in zip-lock bags. Samples from this rock dump were taken randomly, but distance among them was at least 5 m.

Samples were pre-processed on board: They were removed from the nets using running seawater, placed in 2.5 l containers and covered with fresh seawater. An oversaturated menthol-seawater solution was added and the samples were stored at 4°C for a minimum of 5 h. Next borax-buffered formaldehyde was added with fresh seawater to reach a final concentration of 6% formaldehyde. Within 7 days after sampling, all samples were rinsed to minimize formaldehyde residue and placed on ethanol 70% with 3% glycerol for long-term storage.

All samples were sorted into taxonomic groups. Taxa were then identified to the lowest taxonomic level possible, preferably



**Table 1.** Locations of samples with maximum and minimum sampling depth, maximum age, location coordinates (decimal degrees, WGS1984), number of samples per substrate type and months in which sampling took place.

| Location | Max depth | Min Depth | Age max | Coordinates N | Coordinates E | Samples rock | Samples steel | Sample months  |
|----------|-----------|-----------|---------|---------------|---------------|--------------|---------------|----------------|
| BRG      | 28        | 28        | –       | 53.69         | 6.34          | 11           | 0             | August         |
| D15-A    | 30        | 0         | 15      | 54.32         | 2.93          | 0            | 6             | October        |
| K9-A     | 32        | 0         | 27      | 53.52         | 3.99          | 3            | 19            | August         |
| L10-A    | 25        | 0         | 40      | 53.40         | 4.20          | 0            | 22            | April, October |
| L10-G    | 26        | 0         | 30      | 53.49         | 4.20          | 0            | 19            | June           |
| L15-A    | 22        | 6         | 22      | 53.33         | 4.83          | 3            | 16            | June           |
| PAWF     | 25        | 0         | 5       | 52.60         | 4.20          | 13           | 79            | July, October  |

Coordinates of PAWF are average of all samples.

species. The World Register of Marine Species ([WoRMS Editorial Board, 2017](#)) was used as a reference of taxonomic nomenclature.

### Additional data

For comparison of platform data with natural reefs, unpublished raw data were acquired from a study of the benthic diversity of the rocky reefs at the BRG carried out in August 2013. The BRG were sampled using identical methods as used in the platform study although the airlift used was fed by air from scuba equipment and divers followed a 50 m transect line. Samples were taken from large boulders present on the sandy seabed and in gravel fields by scraping off the epibenthic community ([Coolen et al., 2015](#)).

For a comparison with younger installations, raw data from the study of wind turbine foundations and rock dump at the Princess Amalia Wind Farm (PAWF) were used ([Vanagt et al. 2013; Vanagt and Faasse 2014](#)). The PAWF turbine foundations were deployed between November 2006 and March 2007 and surveys were carried out in October 2011 and July 2013. Two samples of 0.056 m<sup>2</sup> were taken from the intertidal zone and at 2, 5, 10, and 17 m using a putty knife and collected in 0.25 mm mesh size nets. Four wind turbine foundations were sampled per survey. Small rocks were collected from the scour protection at random locations around the foundations.

Taxonomy of the BRG and PAWF data sets was synchronized with the platform data using the WoRMS AphiaID service ([World Register of Marine Species, 2015](#)) in R version 3.3.0 ([R Core Team, 2016](#)) using the worms package ([Holstein, 2017](#)) and combined with the platform data in a single dataset. For each sample, location name, depth (m), substrate type (steel/rock), orientation (horizontal/vertical/mixed for smaller rocks), sampling month, and age (years; only artificial structures) were registered. Age was considered to be the number of years since construction, or when cleaning of the construction had taken place: the number of years since cleaning of the substrate. Offshore operators regularly remove part of the epifouling down to –10 m depth to reduce wave load on the structure, depending on thickness of encrusting organisms. Since we expected cleaning might have a different effect on the community than age of the structure, a factor variable (yes/no) indicating whether the sampled depth had been cleaned in the last 5 years was also included in the dataset.

### Data analysis

Data for all species were combined into a single dataset, consisting of 191 samples. In total, 161 samples originated from steel and 30 from rocky substrate. Within this set, species observations

in 35 samples (all from steel) were only available as presence–absence data. These were excluded during modelling but included in the list of taxa observed. Algae and copepods were removed from the dataset since these were not registered in some studies. Observations of juvenile or damaged specimens identified to a level above species were either combined with a species in the same taxon or removed when more than one species was present in the taxon. Only juvenile and damaged taxa in samples with no species in the same taxon were left at the higher level, following [Coolen et al. \(2015\)](#). Given the differences in sampled area (PAWF: 0.056 m<sup>2</sup>, platforms, and BRG: 0.05 m<sup>2</sup>), abundance was converted to individuals per m<sup>2</sup>. Colony forming species were not quantified in all samples and in the different projects various quantification methods had been applied. Therefore all Hydrozoa, Bryozoa, Porifera, Ascidiacea, Entoprocta, and *Alcyonium digitatum* were converted to presence/absence. For data analysis, R version 3.3.0 ([R Core Team, 2016](#)) and RStudio version 0.99.486 ([RStudio Team, 2015](#)) were used. Both univariate and multivariate analyses were performed.

### Univariate analysis

For the univariate analysis, species richness ( $S$ ; number of unique species) was calculated for each sample and used as response variable. The protocol by [Zuur et al. \(2010\)](#) was used for data exploration. The presence of outliers, multicollinearity, and relations between species richness, other biotic, and abiotic variables was assessed using boxplots, Cleveland dotplots ([Cleveland, 1985](#)), pairplots, Pearson correlation coefficients, variance inflation factors, and multipanel scatterplots from the lattice package ([Sarkar, 2008](#)). A power analysis was performed to estimate whether the sample size was sufficient to test the combined set of variables, using the `pwr.f2.test` function from the `pwr` package ([Champely et al., 2017](#)). A power of 0.8,  $p = 0.05$ , a medium effect size of 0.15 ([Cohen, 1988](#)) and 16 coefficients in the full model, including multiple coefficients for the different locations and 2 for each non-linear variable were used.

Species richness may have a non-linear relation with environmental variables, such as depth ([van der Stap et al., 2016](#)). To allow for easy calculation of such relations, all models were constructed using generalized additive models (GAMs). As species richness only results in positive discrete numbers, and initial models applying a Poisson distribution resulted in overdispersed residuals, a negative binomial distribution with log link was used. Models were created with the `gam` function from the `mgcv` package ([Wood, 2011](#)). Random location and orientation effects were included in the GAM to remove dependency among samples, viz. multiple samples taken at a single platform and to correct for

possible confounding effects of orientation. Orientation was not included as prediction variable as differences between orientations were mostly observed between steel and rock. Month in year (January–December = 1–12) was included as a variable to include seasonal effects. Potential keystone species were selected based on personal field observations of dominant species by the authors, and published observations indicating keystone status of species. In addition to *Metridium dianthus*, *Mytilus edulis*, *Psammochinus miliaris*, and Tubulariidae (Menge and Sutherland, 1976; Zintzen et al., 2007; Drent and Dekker, 2013; Coolen et al., 2015), the starfish *Asterias rubens* was included as a potential keystone species (Dolmer, 1998). Depth, month, and all species excluding Tubulariidae (which was registered as presence/absence) were included as a smoothed (non-linear) variable. The maximum number of knots of the smoothers was set to three to reduce overfitting of the smoother and to allow for easier visual interpretation.

Starting from a model including all variables, a set of 11 alternative models was generated. These alternatives included:

- The full model with the removal of each variable, resulting in eight variations
- A model with only the abiotic variables depth, month, substrate
- A model with only the biotic variables *M. dianthus*, *M. edulis*, *P. miliaris*, *A. rubens*, and Tubulariidae
- A model with only depth and the biotic variables *M. dianthus*, *M. edulis*, *P. miliaris*, *A. rubens*, and Tubulariidae

Models were then compared using Akaike Information Criterion (Akaike 1973). The number of samples per variable was <40 for most models considered and therefore AICc was used (Burnham and Anderson, 2004). The model including all variables was validated to assess if underlying assumptions of homogeneity of variance and normality of the residuals were met. Model residuals were plotted against all variables in and outside the model as well as fitted values to assess model fit.

The model including all variables took the following form:

$$\ln(S) = \alpha + f(\text{depth}_i) + f(\text{month}_i) + \beta_3 * \text{substrate}_i + \beta_4 * f(M.\text{dianthus}_i) + \beta_5 * f(M.\text{edulis}_i) + \beta_6 * f(P.\text{miliaris}_i) + \beta_7 * \text{Tubulariidae}_i + \beta_8 * f(A.\text{rubens}_i) + \epsilon_i$$

Where  $S$  is the species richness for sample  $i$ . Term  $f()$  marks a smoothing function and substrate is rock or steel. The residuals  $\epsilon_i$  were assumed to be normally distributed with a mean of 0 and variance of  $\sigma$ .

An additional model was created to assess the effect of age and cleaning of the structures, by using only data for which age was known: samples taken from steel at the platforms and the wind farm. This model took the form shown above, with the addition of age (years) and cleaned (yes/no) as variables.

The total predicted number of species per structure type (platforms, PAWF, BRG) was estimated with the specpool function (vegan package, Oksanen et al. 2008) using the Chao estimate (Chao, 1987).

As De Mesel et al. (2015) reported high fractions of non-indigenous species in intertidal zones of offshore wind turbines, the difference in fraction of non-indigenous species between the

intertidal (depth <2 m) and deeper zone as well as between substrate and between reef types was investigated, using a generalized linear model (GLM) with binomial distribution. Species were assumed to be non-indigenous based on the Dutch list non-indigenous species (Bos et al., 2017), with corrections based on publications showing species on the list were indigenous or cryptogenic (Korringa, 1954; Ates, 2006; Gittenberger et al., 2010; Fofonoff et al., 2017).

### Multivariate analysis

For the multivariate analysis, a dissimilarity matrix (Bray–Curtis dissimilarity index; Bray and Curtis, 1957) was created by non-metric multidimensional scaling (MDS) using the function metaMDS from the vegan package (Oksanen et al., 2008) with a minimum of 100 tries. The number of dimensions needed for the MDS was assessed using Scree plots (Cattell, 1966). The goodness of fit of the MDS was evaluated using a Shepard plot (Shepard et al., 1972). In plots of the dissimilarity matrix, clustering of samples according to location group and substrate type were visualized using the ordiellipse function (vegan package).

A PERMANOVA (10 000 permutations, Bray–Curtis dissimilarity index; Anderson 2001) using the untransformed abundance data was applied to assess the effect of the same variables as used for the univariate analysis, including location as additional factor variable, using the adonis function from the vegan package (Oksanen et al., 2008). Using a MDS plot, the multivariate spread among groups (structure type) was assessed, since PERMANOVA is sensitive to differences in multivariate spread (Anderson, 2005).

### Results

The complete dataset is available as Supplementary material and included 193 species and 105 taxa at a higher level, from 7 locations (Tables 2 and 3). In total, 143 species ( $n=88$  samples) were observed on platforms, 95 species ( $n=92$ ) on the foundations located in the PAWF, and 49 species ( $n=11$ ) on the BRG. Total species richness on individual platforms varied between 41 on D15-A ( $n=6$ ) and 86 on K9-A ( $n=22$ ). Species richness per sample varied strongly between reef types (Figure 3a).

The vertical profile of frequent species on the platforms was similar to other installations in the North Sea (Krone et al., 2013; De Mesel et al., 2015). From the intertidal zone down to 10–15 m, *Mytilus edulis* was most observed, in densities up to 23 000 individuals per  $\text{m}^2$ , changing into a Tubulariidae—*Jassa herdmani* community between 10 and 20 m. *Jassa herdmani* were found in densities of up to  $1.45 * 10^6$  individuals per  $\text{m}^2$ . Below 20 m, the community on the steel structures was most frequently inhabited by *Metridium dianthus*, with up to 720 individuals per  $\text{m}^2$ .

The following species were present in at least 50% of the samples on the steel of the platforms: the amphipods *Jassa herdmani* (Walker, 1893) and *Stenothoe monoculoides* (Montagu, 1815), mussel *M. edulis*, sea anemone *M. dianthus*, bryozoan *Electra pilosa* (Linnaeus, 1767), and anomuran crustacean *Pisidia longicornis* (Linnaeus, 1767). Of these common steel species, *M. dianthus* and *E. pilosa* were also present in >50% of the samples from BRG rocks and rock dump around artificial structures, whereas *J. herdmani* and *S. monoculoides* were common on rock dump, but never observed in BRG rock samples. *M. edulis* was found in 27% of the rock dump samples, with only a single observation on the BRG rocks. *P. longicornis* was found in 41% of the rock dump samples but never on rocks of the BRG.

**Table 2.** Full species list with presence (X), absence (–) of species per reef type, non-indigenous status of each species (X = non-indigenous), minimum (min) and maximum (max) depth of observation in meters.

| Species                         | PAWF | Platforms | BRG | Non-indigenous | Min | Max |
|---------------------------------|------|-----------|-----|----------------|-----|-----|
| Annelida                        |      |           |     |                |     |     |
| <i>Ctenodrilus serratus</i>     | X    | –         | –   |                | 2   | 17  |
| <i>Eumida sanguinea</i>         | –    | X         | –   |                | 5   | 5   |
| <i>Eunereis longissima</i>      | X    | X         | X   |                | 0   | 32  |
| <i>Eusyllis blomstrandii</i>    | –    | X         | –   |                | 0   | 20  |
| <i>Harmothoe aspera</i>         | –    | X         | –   |                | 15  | 20  |
| <i>Harmothoe clavigera</i>      | –    | X         | X   |                | 15  | 28  |
| <i>Harmothoe extenuata</i>      | X    | X         | –   |                | 0   | 32  |
| <i>Harmothoe fernandi</i>       | –    | X         | X   |                | 6   | 32  |
| <i>Harmothoe impar</i>          | X    | X         | X   |                | 0   | 28  |
| <i>Harmothoe viridis</i>        | –    | X         | –   |                | 15  | 20  |
| <i>Lagis koreni</i>             | X    | –         | –   |                | 2   | 2   |
| <i>Lanice conchilega</i>        | X    | X         | –   |                | 2   | 25  |
| <i>Lepidonotus squamatus</i>    | X    | X         | X   |                | 0   | 28  |
| <i>Malacoceros fuliginosus</i>  | X    | –         | –   |                | 10  | 10  |
| <i>Myrianida prolifera</i>      | –    | X         | –   |                | 11  | 11  |
| <i>Nereis pelagica</i>          | X    | X         | –   |                | 0   | 23  |
| <i>Nothria conchylega</i>       | –    | X         | –   |                | 10  | 20  |
| <i>Notomastus latericeus</i>    | –    | X         | –   |                | 32  | 32  |
| <i>Phyllodoce laminosa</i>      | X    | –         | –   |                | 0   | 10  |
| <i>Phyllodoce longipes</i>      | –    | X         | –   |                | 32  | 32  |
| <i>Phyllodoce maculata</i>      | X    | X         | –   |                | 15  | 25  |
| <i>Phyllodoce mucosa</i>        | X    | –         | –   |                | 2   | 17  |
| <i>Polydora ciliata</i>         | –    | X         | –   |                | 16  | 16  |
| <i>Proceraea cornuta</i>        | –    | X         | X   |                | 0   | 28  |
| <i>Proceraea prismatica</i>     | –    | –         | X   |                | 28  | 28  |
| <i>Psamathe fusca</i>           | –    | X         | –   |                | 20  | 20  |
| <i>Pseudopolydora pulchra</i>   | –    | –         | X   |                | 28  | 28  |
| <i>Sabellaria spinulosa</i>     | X    | X         | X   |                | 0   | 32  |
| <i>Spirobranchus lamarcki</i>   | –    | X         | –   |                | 10  | 15  |
| <i>Spirobranchus triqueter</i>  | X    | –         | –   |                | 23  | 23  |
| <i>Sthenelais boa</i>           | –    | X         | –   |                | 32  | 32  |
| <i>Subadyte pellucida</i>       | –    | X         | –   |                | 14  | 32  |
| <i>Syllis amica</i>             | –    | X         | –   |                | 5   | 15  |
| <i>Syllis armillaris</i>        | –    | X         | –   |                | 0   | 25  |
| <i>Syllis gracilis</i>          | –    | X         | –   |                | 0   | 30  |
| <i>Syllis hyalina</i>           | –    | X         | –   |                | 5   | 15  |
| <i>Syllis prolifera</i>         | X    | –         | –   |                | 0   | 25  |
| <i>Syllis vittata</i>           | –    | X         | –   |                | 6   | 20  |
| <i>Syllis vivipara</i>          | –    | X         | –   |                | 6   | 15  |
| Arthropoda                      |      |           |     |                |     |     |
| <i>Abludomelita obtusata</i>    | X    | X         | –   |                | 24  | 32  |
| <i>Amphibalanus improvisus</i>  | X    | –         | –   | X              | 0   | 0   |
| <i>Aora gracilis</i>            | –    | X         | X   |                | 28  | 32  |
| <i>Argissa hamatipes</i>        | –    | X         | –   |                | 20  | 20  |
| <i>Austrominius modestus</i>    | X    | –         | –   | X              | 0   | 0   |
| <i>Balanus balanus</i>          | –    | X         | X   |                | 5   | 32  |
| <i>Balanus crenatus</i>         | X    | X         | –   |                | 0   | 32  |
| <i>Cancer pagurus</i>           | X    | X         | –   |                | 2   | 32  |
| <i>Caprella linearis</i>        | X    | X         | X   |                | 0   | 28  |
| <i>Caprella mutica</i>          | X    | X         | –   | X              | 5   | 17  |
| <i>Crassikorophium bonellii</i> | –    | X         | –   |                | 20  | 20  |
| <i>Eualus cranchii</i>          | –    | X         | –   |                | 32  | 32  |
| <i>Galathea intermedia</i>      | –    | X         | –   |                | 32  | 32  |
| <i>Gammaropsis nitida</i>       | –    | X         | –   |                | 20  | 20  |
| <i>Gitana sarsi</i>             | X    | X         | –   |                | 2   | 30  |
| <i>Homarus gammarus</i>         | X    | –         | –   |                | 25  | 25  |
| <i>Hyperia galba</i>            | –    | X         | X   |                | 28  | 30  |
| <i>Idotea pelagica</i>          | X    | X         | –   |                | 0   | 30  |
| <i>Ischyrocerus anguipes</i>    | –    | –         | X   |                | 28  | 28  |
| <i>Jassa herdmani</i>           | X    | X         | –   |                | 0   | 32  |

Continued

Table 2. Continued

| Species                                       | PAWF | Platforms | BRG | Non-indigenous | Min | Max |
|-----------------------------------------------|------|-----------|-----|----------------|-----|-----|
| <i>Jassa marmorata</i>                        | X    | X         | –   |                | 0   | 17  |
| <i>Lepidepcreum longicornis</i>               | –    | –         | X   |                | 28  | 28  |
| <i>Liocarcinus depurator</i>                  | –    | X         | –   |                | 32  | 32  |
| <i>Liocarcinus holsatus</i>                   | –    | –         | X   |                | 28  | 28  |
| <i>Liocarcinus navigator</i>                  | –    | –         | X   |                | 28  | 28  |
| <i>Macropodia rostrata</i>                    | –    | –         | X   |                | 28  | 28  |
| <i>Megabalanus coccopoma</i>                  | X    | –         | –   | X              | 0   | 2   |
| <i>Metopa alderi</i>                          | X    | –         | –   |                | 5   | 23  |
| <i>Metopa borealis</i>                        | –    | X         | –   |                | 30  | 32  |
| <i>Metopa bruzelii</i>                        | –    | X         | –   |                | 5   | 11  |
| <i>Metopa pusilla</i>                         | –    | X         | –   |                | 0   | 25  |
| <i>Microtopus maculatus</i>                   | –    | X         | –   |                | 20  | 22  |
| <i>Monocorophium acherusicum</i>              | X    | X         | X   |                | 2   | 28  |
| <i>Monocorophium insidiosum</i>               | –    | X         | –   |                | 5   | 5   |
| <i>Monocorophium sextonae</i>                 | X    | X         | –   | X              | 5   | 32  |
| <i>Necora puber</i>                           | X    | –         | –   |                | 5   | 17  |
| <i>Nototropis swammerdamei</i>                | –    | X         | –   |                | 15  | 22  |
| <i>Nymphon brevistrore</i>                    | –    | –         | X   |                | 28  | 28  |
| <i>Pandalus montagui</i>                      | –    | –         | X   |                | 28  | 28  |
| <i>Phtisica marina</i>                        | X    | X         | –   |                | 0   | 32  |
| <i>Pilumnus hirtellus</i>                     | X    | X         | –   |                | 2   | 25  |
| <i>Pilumnus spinifer</i>                      | –    | X         | –   |                | 11  | 11  |
| <i>Pinnotheres pisum</i>                      | X    | X         | –   |                | 5   | 14  |
| <i>Pisidia longicornis</i>                    | X    | X         | –   |                | 0   | 32  |
| <i>Semibalanus balanoides</i>                 | X    | X         | –   |                | 0   | 24  |
| <i>Stenothoe marina</i>                       | –    | X         | X   |                | 5   | 32  |
| <i>Stenothoe monoculoides</i>                 | X    | X         | –   |                | 0   | 32  |
| <i>Stenothoe tergestina</i>                   | –    | X         | –   |                | 15  | 15  |
| <i>Stenothoe valida</i>                       | X    | X         | –   |                | 0   | 25  |
| <i>Stenula solbergi</i>                       | –    | X         | –   |                | 10  | 30  |
| <i>Telmatogeton japonicus</i>                 | X    | X         | –   | X              | 0   | 10  |
| <i>Tryphosa nana</i>                          | –    | X         | –   |                | 22  | 22  |
| <i>Tryphosella sarsi</i>                      | –    | –         | X   |                | 28  | 28  |
| <i>Verruca stroemia</i>                       | X    | X         | –   |                | 0   | 32  |
| Bryozoa                                       |      |           |     |                |     |     |
| <i>Aetea anguina</i>                          | –    | X         | –   |                | 5   | 5   |
| <i>Alcyonidioides mytili</i>                  | X    | X         | –   |                | 5   | 32  |
| <i>Alcyonidium condylocinereum</i>            | X    | X         | –   |                | 10  | 23  |
| <i>Alcyonidium hydrocoailitum</i>             | –    | –         | X   |                | 28  | 28  |
| <i>Alcyonidium mamillatum</i>                 | X    | –         | –   |                | 2   | 25  |
| <i>Alcyonidium parasiticum</i>                | X    | X         | X   |                | 5   | 28  |
| <i>Arachnidium fibrosum</i>                   | X    | X         | –   |                | 0   | 32  |
| <i>Aspidelectra melolontha</i>                | –    | X         | –   |                | 32  | 32  |
| <i>Bicellariella ciliata</i>                  | –    | X         | –   |                | 5   | 5   |
| <i>Bugulina turbinata</i>                     | –    | X         | –   |                | 22  | 22  |
| <i>Buskia nitens</i>                          | –    | X         | –   |                | 5   | 15  |
| <i>Callopora dumerilii</i>                    | X    | X         | –   |                | 5   | 25  |
| <i>Celleporella hyalina</i>                   | X    | X         | –   |                | 0   | 25  |
| <i>Conopeum reticulum</i>                     | X    | X         | X   |                | 5   | 32  |
| <i>Cribrilina punctata</i>                    | –    | X         | –   |                | 15  | 32  |
| <i>Electra pilosa</i>                         | X    | X         | X   |                | 0   | 32  |
| <i>Escharella immersa</i>                     | –    | X         | –   |                | 32  | 32  |
| <i>Farrella repens</i>                        | X    | –         | –   |                | 25  | 25  |
| <i>Fenestrulina delicia</i>                   | X    | –         | –   | X              | 24  | 25  |
| <i>Microporella ciliata</i>                   | X    | X         | –   |                | 15  | 25  |
| <i>Schizomavella (Schizomavella) linearis</i> | X    | X         | –   |                | 15  | 25  |
| <i>Scruparia ambigua</i>                      | X    | X         | X   |                | 2   | 28  |
| <i>Scruparia chelata</i>                      | –    | X         | –   |                | 5   | 25  |
| <i>Smittoidea prolifica</i>                   | X    | –         | –   | X              | 24  | 25  |
| Chordata                                      |      |           |     |                |     |     |
| <i>Diplosoma listerianum</i>                  | X    | X         | X   | X              | 2   | 30  |
| <i>Liparis liparis liparis</i>                | –    | –         | X   |                | 28  | 28  |

Continued

Table 2. Continued

| Species                        | PAWF | Platforms | BRG | Non-indigenous | Min | Max |
|--------------------------------|------|-----------|-----|----------------|-----|-----|
| Cnidaria                       |      |           |     |                |     |     |
| <i>Actinothoe sphyrodeta</i>   | –    | X         | –   |                | 0   | 16  |
| <i>Alcyonium digitatum</i>     | X    | X         | –   |                | 5   | 25  |
| <i>Calycella syringa</i>       | –    | X         | X   |                | 0   | 28  |
| <i>Campanularia volubilis</i>  | –    | –         | X   |                | 28  | 28  |
| <i>Clytia gracilis</i>         | –    | X         | –   |                | 0   | 25  |
| <i>Clytia hemisphaerica</i>    | X    | X         | X   |                | 10  | 32  |
| <i>Corynactis viridis</i>      | –    | X         | –   |                | 10  | 10  |
| <i>Coryne pusilla</i>          | –    | X         | –   |                | 0   | 0   |
| <i>Diadumene cincta</i>        | X    | X         | –   |                | 0   | 20  |
| <i>Diadumene lineata</i>       | –    | X         | –   | X              | 32  | 32  |
| <i>Ectopleura larynx</i>       | X    | X         | X   |                | 2   | 28  |
| <i>Garveia nutans</i>          | –    | –         | X   |                | 28  | 28  |
| <i>Gonothyrea loveni</i>       | –    | X         | –   |                | 25  | 25  |
| <i>Hartlaubella gelatinosa</i> | –    | X         | –   |                | 30  | 30  |
| <i>Hydractinia echinata</i>    | X    | X         | –   |                | 10  | 25  |
| <i>Laomedea calceolifera</i>   | –    | X         | –   |                | 30  | 30  |
| <i>Laomedea flexuosa</i>       | X    | X         | –   |                | 0   | 20  |
| <i>Laomedea neglecta</i>       | –    | X         | –   |                | 30  | 30  |
| <i>Metridium dianthus</i>      | X    | X         | X   |                | 0   | 30  |
| <i>Obelia bidentata</i>        | –    | X         | X   |                | 0   | 28  |
| <i>Obelia dichotoma</i>        | X    | X         | X   |                | 0   | 28  |
| <i>Obelia longissima</i>       | X    | X         | –   |                | 0   | 25  |
| <i>Sagartia elegans</i>        | X    | X         | –   |                | 0   | 32  |
| <i>Sagartia troglodytes</i>    | X    | –         | –   |                | 2   | 25  |
| <i>Sagartiogeton undatus</i>   | X    | –         | –   |                | 2   | 25  |
| <i>Sertularia argentea</i>     | –    | –         | X   |                | 28  | 28  |
| <i>Sertularia cupressina</i>   | –    | –         | X   |                | 28  | 28  |
| <i>Tubularia indivisa</i>      | X    | –         | –   |                | 2   | 25  |
| <i>Urticina felina</i>         | X    | X         | –   |                | 2   | 11  |
| Echinodermata                  |      |           |     |                |     |     |
| <i>Amphipholis squamata</i>    | –    | X         | –   |                | 5   | 20  |
| <i>Asterias rubens</i>         | X    | X         | –   |                | 2   | 25  |
| <i>Crossaster papposus</i>     | –    | X         | –   |                | 5   | 5   |
| <i>Echinocardium cordatum</i>  | X    | –         | –   |                | 17  | 17  |
| <i>Ophiothrix fragilis</i>     | X    | X         | –   |                | 2   | 32  |
| <i>Psammochinus miliaris</i>   | X    | X         | –   |                | 2   | 32  |
| Entoprocta                     |      |           |     |                |     |     |
| <i>Pedicellina cernua</i>      | –    | –         | X   |                | 28  | 28  |
| Mollusca                       |      |           |     |                |     |     |
| <i>Acanthodoris pilosa</i>     | –    | X         | –   |                | 32  | 32  |
| <i>Aeolidia papillosa</i>      | X    | X         | –   |                | 2   | 32  |
| <i>Brachystomia scalaris</i>   | X    | X         | –   |                | 0   | 25  |
| <i>Catriona gymnota</i>        | X    | X         | –   |                | 2   | 16  |
| <i>Corbula gibba</i>           | –    | X         | –   |                | 32  | 32  |
| <i>Crepidula fornicata</i>     | X    | –         | X   | X              | 10  | 28  |
| <i>Dendronotus frondosus</i>   | X    | X         | X   |                | 2   | 28  |
| <i>Doto coronata</i>           | X    | –         | –   |                | 0   | 0   |
| <i>Epitonium clathratulum</i>  | X    | –         | –   |                | 10  | 25  |
| <i>Eubranchus exiguus</i>      | –    | X         | –   |                | 0   | 22  |
| <i>Fabulina fabula</i>         | –    | X         | –   |                | 11  | 20  |
| <i>Heteranomia squamula</i>    | X    | X         | –   |                | 0   | 30  |
| <i>Hiatella arctica</i>        | X    | X         | –   |                | 0   | 24  |
| <i>Hyala vitrea</i>            | –    | X         | –   |                | 20  | 20  |
| <i>Kellia suborbicularis</i>   | –    | X         | –   |                | 0   | 20  |
| <i>Kurtiella bidentata</i>     | –    | X         | –   |                | 6   | 32  |
| <i>Lepton squamosum</i>        | –    | X         | –   |                | 5   | 22  |
| <i>Magallana gigas</i>         | X    | X         | –   | X              | 0   | 0   |
| <i>Musculus discors</i>        | –    | –         | X   |                | 28  | 28  |
| <i>Musculus subpictus</i>      | –    | –         | X   |                | 28  | 28  |
| <i>Mytilus edulis</i>          | X    | X         | X   |                | 0   | 32  |
| <i>Onchidoris bilamellata</i>  | X    | X         | –   |                | 21  | 32  |

Continued



Table 2. Continued

| Species                                    | PAWF | Platforms | BRG | Non-indigenous | Min | Max |
|--------------------------------------------|------|-----------|-----|----------------|-----|-----|
| <i>Onchidoris muricata</i>                 | –    | –         | X   |                | 28  | 28  |
| <i>Ostrea edulis</i>                       | X    | –         | –   |                | 0   | 2   |
| <i>Sphenia binghami</i>                    | –    | X         | –   |                | 0   | 0   |
| <i>Tergipes tergipes</i>                   | –    | X         | –   |                | 0   | 22  |
| <i>Tritonia hombergii</i>                  | –    | X         | –   |                | 11  | 15  |
| <i>Venerupis corrugata</i>                 | X    | –         | –   |                | 2   | 21  |
| <i>Emplectonema gracile</i>                | X    | –         | –   |                | 0   | 10  |
| Platyhelminthes                            |      |           |     |                |     |     |
| <i>Leptoplana tremellaris</i>              | X    | –         | –   |                | 17  | 17  |
| Porifera                                   |      |           |     |                |     |     |
| <i>Halichondria (Halichondria) panacea</i> | –    | X         | –   |                | 5   | 30  |
| <i>Leucosolenia botryoides</i>             | –    | X         | –   |                | 5   | 20  |
| <i>Leucosolenia variabilis</i>             | X    | X         | –   |                | 2   | 21  |
| <i>Mycale (Carmia) macilenta</i>           | –    | X         | –   |                | 15  | 20  |
| <i>Sycon ciliatum</i>                      | –    | X         | X   |                | 6   | 28  |
| Chlorophyta                                |      |           |     |                |     |     |
| <i>Blidingia minima</i>                    | X    | –         | –   |                | 0   | 2   |
| <i>Prasiola stipitata</i>                  | X    | –         | –   |                | 0   | 0   |

**Table 3.** Observed and predicted species richness for all locations and the platforms combined with total species richness ( $S_{\text{total}}$ ), predicted species richness (Chao) with standard error ( $\text{Chao}_{\text{SE}}$ ), the increase in richness from observed to predicted (Increase), and number of samples ( $n$ ).

| Location        | $S_{\text{total}}$ | Chao   | $\text{Chao}_{\text{SE}}$ | Increase | $n$ |
|-----------------|--------------------|--------|---------------------------|----------|-----|
| BRG             | 48                 | 73.83  | 13.90                     | 34.98%   | 11  |
| D15-A           | 40                 | 53.33  | 8.94                      | 25.00%   | 6   |
| K9-A            | 82                 | 106.82 | 12.92                     | 23.23%   | 22  |
| L10-A           | 71                 | 86.46  | 9.62                      | 17.88%   | 22  |
| L10-G           | 66                 | 79.95  | 8.65                      | 17.45%   | 19  |
| L15-A           | 75                 | 98.21  | 13.63                     | 23.63%   | 19  |
| PAWF            | 95                 | 100.93 | 4.54                      | 5.88%    | 92  |
| Platforms total | 138                | 171.99 | 14.51                     | 19.76%   | 88  |

Based on species list excluding higher taxa.

In total, 12 non-indigenous species (Bos *et al.*, 2017) were present in the samples, excluding *Diadumene cincta*, *Jassa marmorata*, *Monocorophium acherusicum*, *Balanus balanus*, and *Sabellaria spinulosa*, which are registered as non-indigenous in the Netherlands but were deemed cryptogenic or indigenous based on literature review (Korringa, 1954; Ates, 2006; Southward, 2008; Gittenberger *et al.*, 2010; Fofonoff *et al.*, 2017). In total, 61 samples held no non-indigenous species while 88 held a single one and 42 samples held  $\geq 2$ . Within the wind farm, 64% of the samples held one or more non-indigenous species and 11 non-indigenous species were found in total (9 on steel and 4 on rock dump). At platforms, 74% of the samples contained non-indigenous species, with a total of 6 observed (5 on steel, 2 on rock dump), while 2 non-indigenous species were found on the BRG, in 55% of the samples. The percentage of non-indigenous species per sample differed significantly ( $p < 0.001$ ) between the intertidal ( $13 \pm 2\%$  standard error) and the deeper parts ( $5 \pm 0.4\%$  SE) but not between reef types (PAWF, platforms, BRG,  $p = 0.9$ ) or substrates (steel, rock;  $p = 0.3$ ). The most frequent non-indigenous species was the tunicate *Diplosoma listerianum*, which was most frequent between 5 and 25 m (present in 85 samples). Several species known for the broader region but not reported before in Dutch waters were observed, including the bryozoan *Cribrilina punctata* (Beukhof *et al.*,

2016) and annelids *Harmothoe aspera* (Spierings *et al.*, 2017) and *Syllis vittata* (Dias *et al.*, 2017).

The total predicted species richness (only species, no higher taxa) for all platforms ( $S = 172$ ) was higher than for the PAWF ( $S = 101$ ) and more than double that of the BRG ( $S = 74$ ). The predicted richness on individual platforms ranged between 53 on D15-A and 107 on K9-A (Table 3). The average species richness per location was 70 ( $\pm 19$  standard deviation). Beta diversity between locations was 2.75 [Sørensen index 0.29,  $N = 7$  (Sørensen, 1948)]. The difference between observed and predicted species richness indicates that with 35% difference, the BRG would need much more samples to find most species present. In contrast, the difference between species found and expected is low for the PAWF (6%), indicating that the sampling performed here was thorough and not many species remained to be found. Found vs. predicted number of species on the platforms was intermediate, with a potential increase in species number of 20% with higher sampling effort.

### Univariate analysis

The power analysis showed that a minimum of 142 samples would be needed, indicating that the sample size of 156 was sufficient. Model comparison showed that model M8, including all variables but *A. rubens* had the lowest AICc as well as the highest deviance explained (63.7%).  $\Delta\text{AICc}$  of none of the other models was  $< 2$  compared with M8, while M0 (the full model), M3 (without substrate), M2 (without sample month), and M11 (without month and substrate) had  $\Delta\text{AICc}$  between 2 and 4. All further alternatives had  $\Delta\text{AICc} > 4$  (Table 4). Based on these results model M8 was selected for further evaluation.

M8 held 7 variables, and the deviance explained by the model was 63.7%, with an adjusted  $R^2$  of 0.57 and 20.45 degrees of freedom. M8 took the following form, with a base model using factor Tubulariidae as absent and substrate as rocks:

$$\ln(S) = 2.970 + f(\text{Depth}) + f(\text{Month}) - 0.07 * \text{Substrate}_{\text{Steel}} + f(M.\text{dianthus}) + f(M.\text{edulis}) + f(P.\text{miliaris}) + 0.52 * \text{Tubulariidae}$$

See Table 5 for the summary of this model. Model validation showed homogeneity and normal distribution of the residuals,

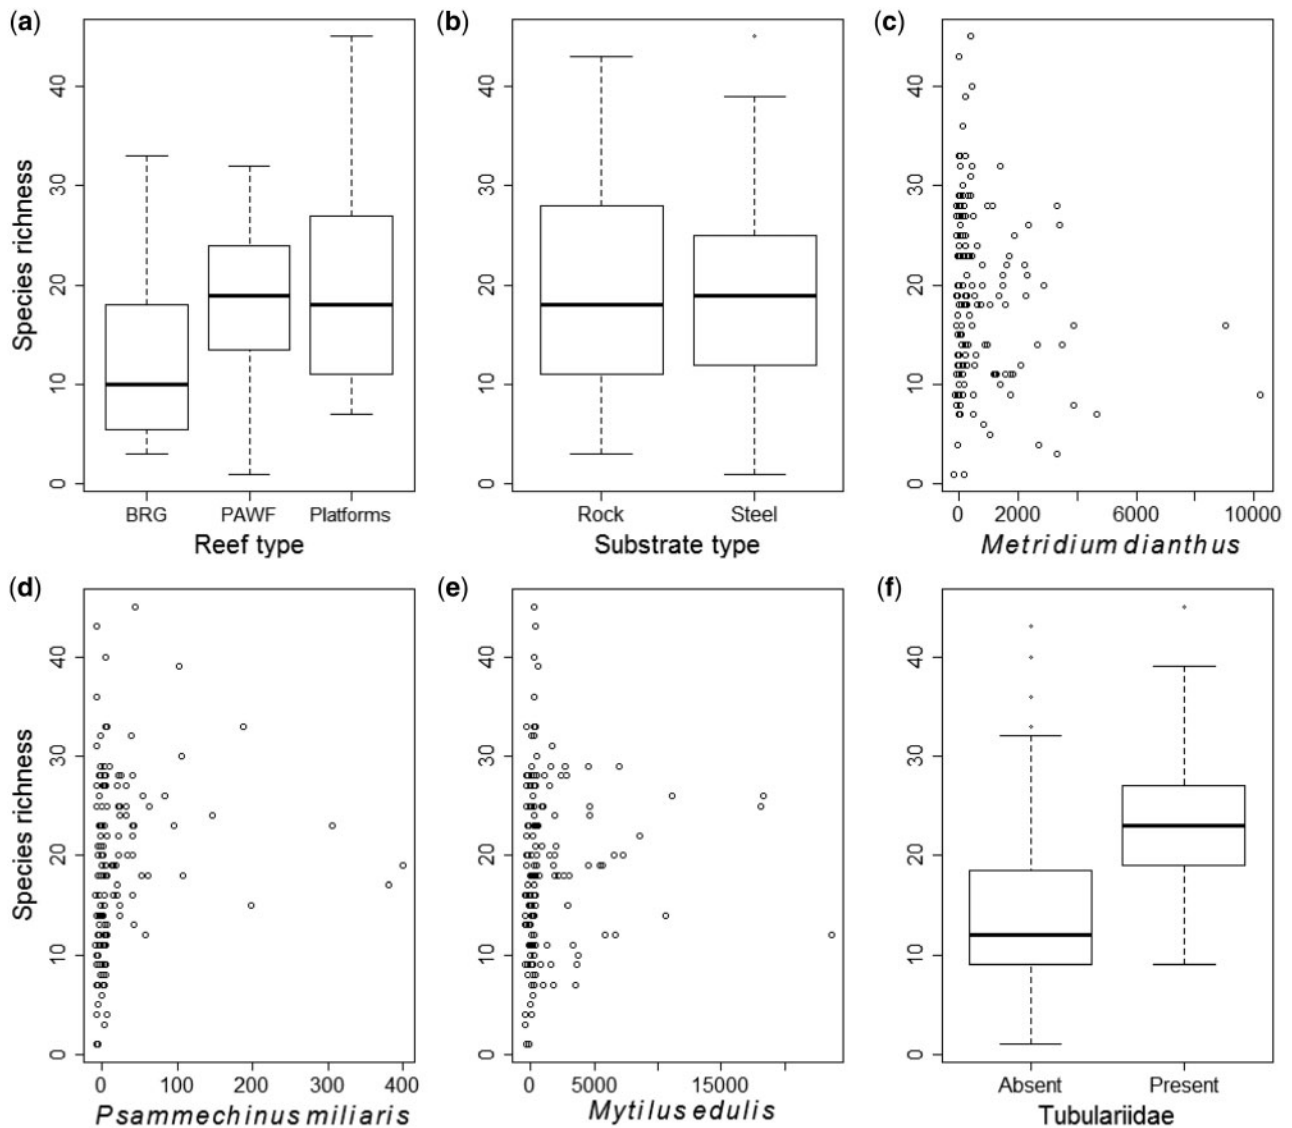

**Figure 3.** Observed richness per sample (total 193 species plus 105 higher taxa; 191 samples). Samples grouped per reef type (a), substrate type (b), and by abundance (c–e), or absence/presence (f) of keystone species. BRG, Borkum Reef Grounds; PAWF, Princess Amalia Wind Farm.

**Table 4.** Overview of full model and all alternative models considered (excluded variables indicated with –), *p*-value for all variables ( $p < 0.001$ : \*\*\*,  $p < 0.01$ : \*\*,  $p < 0.05$ : \*,  $p < 0.1$ : .,  $p > 0.1$ : ns) and estimate for linear variables (estimates for smoother variables can be derived from Figure 4).

| Model | Depth | Month | Substrate | <i>p</i> | <i>M. dianthus</i> | <i>M. edulis</i> | <i>P. miliaris</i> | Tubulariidae | <i>p</i> | <i>A. rubens</i> | ΔAICc | Dev   | df    |
|-------|-------|-------|-----------|----------|--------------------|------------------|--------------------|--------------|----------|------------------|-------|-------|-------|
| Full  | ***   | .     | –0.059    | ns       | ***                | ***              | *                  | 0.520        | ns       | ns               | 2.68  | 63.7% | 21.46 |
| M1    | –     | *     | 0.422     | ns       | **                 | ns               | ns                 | 0.608        | ***      | ns               | 39.57 | 51.2% | 17.30 |
| M2    | ***   | –     | 0.369     | ns       | ***                | ***              | *                  | 0.523        | ***      | ns               | 3.99  | 62.3% | 19.63 |
| M3    | ***   | –     | –         | –        | ***                | ***              | *                  | 0.520        | ***      | ns               | 2.03  | 63.7% | 21.14 |
| M4    | ***   | **    | –0.352    | **       | –                  | ***              | *                  | 0.501        | ***      | ns               | 16.33 | 58.6% | 18.69 |
| M5    | ***   | ns    | 0.115     | ns       | ***                | –                | *                  | 0.556        | ***      | ns               | 22.22 | 56.4% | 17.64 |
| M6    | ***   | ns    | –0.093    | ns       | ***                | ***              | –                  | 0.548        | ***      | ns               | 6.41  | 61.4% | 19.22 |
| M7    | ***   | ns    | –0.177    | ns       | **                 | ***              | **                 | –            | –        | ns               | 67.14 | 43.9% | 19.12 |
| M8    | ***   | –     | –0.071    | ns       | ***                | ***              | *                  | 0.516        | ***      | –                | 0     | 63.7% | 20.45 |
| M9    | ***   | ns    | –0.153    | ns       | –                  | –                | –                  | –            | –        | –                | 90.01 | 27.8% | 11.79 |
| M10   | –     | –     | –         | –        | **                 | ns               | ns                 | 0.602        | ***      | ns               | 42.98 | 48.9% | 15.67 |
| M11   | ***   | –     | –         | –        | ***                | ***              | *                  | 0.519        | ***      | ns               | 3.41  | 62.1% | 19.19 |

With ΔAICc (AICc model – AICc M8), deviance explained (Dev) and degrees of freedom (df).

with no strong undesirable patterns. The typical non-linear relations between smoother variables and species richness are visualized in Figure 4. In general, the model shows the highest species richness in intermediate depths, with high abundance of *P. miliaris*, *M. edulis*, and presence of Tubulariidae, as well as low abundance of *M. dianthus*.

When assessing the impact of age and cleaning activities on species richness on steel structures, age and cleaning only explained <0.1% and 0.3% of the variation. Also, both had a

non-significant effect ( $p > 0.1$ ). Since both variables were non-significant and further results were similar to the model presented above, this model is not presented here.

### Multivariate analysis

Based on the Scree plot, two dimensions were used for the non-metric MDS, since there was no strong difference between two and three dimensions and two dimensions are easier to interpret. The MDS had a non-metric fit ( $R^2$ ) of 0.96 with stress 0.21. The visualization showed a large overlap in steel and rock samples, and between the different locations. Part of the PAWF samples clustered strongly but this was within the more various spread of the platform samples. Overlap was present between PAWF and BRG and there was no separation between clusters (Figure 5). The ordination of the samples showed a strong relation with depth ( $p < 0.001$ ). Samples taken from deep steel showed a higher similarity to BRG samples than shallow steel samples.

All terms included in the PERMANOVA had a significant ( $p < 0.01$ ) effect on community composition with the exception of *A. rubens* ( $p = 0.63$ ) and *M. dianthus* ( $p = 0.051$ ; Table 6). Tubulariidae and location explained most of the variation in the dataset ( $R^2 = 0.11$  and 0.10, respectively), while depth had an  $R^2$  of 0.07.  $R^2$  of the other variables varied between 0.004 and

**Table 5.** Detailed model results model M8.

| Linear terms                 | Estimate | Std.    | Error   | $p$ -value |
|------------------------------|----------|---------|---------|------------|
| Intercept                    | 2.96752  | 0.21914 | 13.541  | <0.001     |
| Tubulariidae                 | 0.51551  | 0.05934 | 8.688   | <0.001     |
| Substrate                    | -0.07078 | 0.20363 | -0.348  | 0.728      |
| Smoothed non-linear terms    | edf      | Ref. df | Chi. sq | $p$ -value |
| Depth                        | 1.9025   | 1.98    | 44.817  | <0.001     |
| Month                        | 1.6944   | 1.897   | 4.488   | 0.087      |
| <i>Metridium dianthus</i>    | 1.7392   | 1.929   | 20.697  | <0.001     |
| <i>Mytilus edulis</i>        | 1.8865   | 1.986   | 30.177  | <0.001     |
| <i>Psammechinus miliaris</i> | 1.7423   | 1.931   | 8.535   | 0.027      |
| Smoothed random effects      | edf      | Ref. df | Chi. sq | $p$ -value |
| Location                     | 5.2217   | 6       | 86.111  | <0.001     |
| Orientation                  | 0.7594   | 2       | 2.186   | 0.288      |

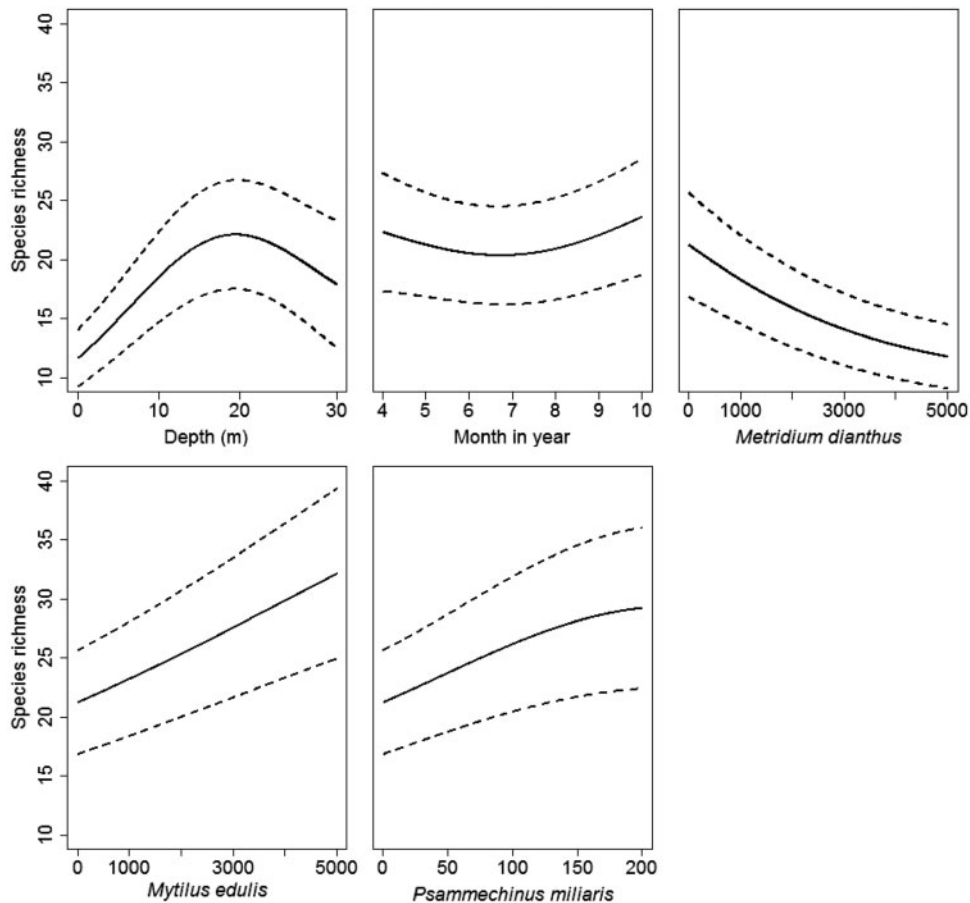

**Figure 4.** Modelled relation between non-linear smoothed variables and species richness (only species, no higher taxa) per sample (solid line) with standard error (dashed lines). Variables other than presented in the respective graphs were set to the following constants for prediction purposes: Depth: 15 m, month: 5 (May), substrate: steel, organisms: 0.

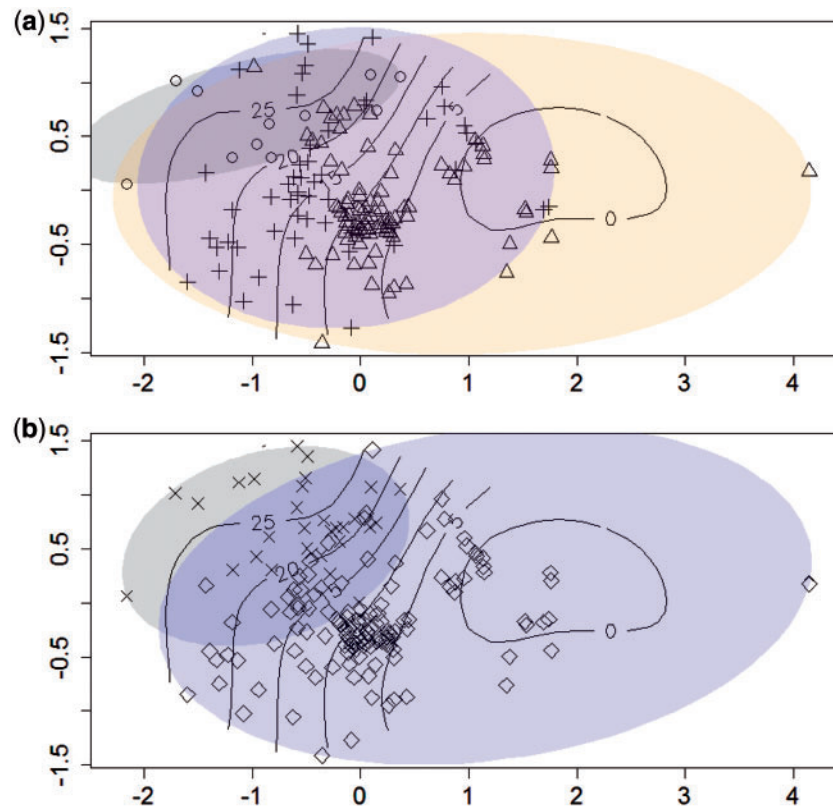

**Figure 5.** MDS plots of all reef data (stress = 0.21), showing variables per sample. Black lines: isodepth lines. (a) By reef type (dark and circles: BRG, Borkum Reef Grounds [ $n = 11$ ], yellow and triangles: Princess Amalia Wind Farm [ $n = 92$ ], blue and plus sign: platforms [ $n = 88$ ]). (b) By substrate type (blue and diamonds: steel from platform and wind turbine foundations [ $n = 161$ ], black and X: rocks from BRG and rock dump around platform and wind turbine foundations [ $n = 30$ ]). Pair of points on the far right originate from the intertidal zone in PAWF and hold only 2 and 3 species.

**Table 6.** PERMANOVA all data with species and higher taxa, based on Bray Curtis distance measure.

|                              | Df  | Sums of sqs. | Mean sqs. | F. model | R <sup>2</sup> | p-value |
|------------------------------|-----|--------------|-----------|----------|----------------|---------|
| <i>Asterias rubens</i>       | 1   | 0.196        | 0.1956    | 0.7987   | 0.00337        | 0.6     |
| <i>Metridium dianthus</i>    | 1   | 0.457        | 0.4565    | 1.8644   | 0.00787        | 0.05    |
| <i>Mytilus edulis</i>        | 1   | 0.925        | 0.9254    | 3.7795   | 0.01595        | <0.001  |
| <i>Psammechinus miliaris</i> | 1   | 1.453        | 1.4532    | 5.9349   | 0.02505        | <0.001  |
| Month                        | 1   | 2.02         | 2.0196    | 8.248    | 0.03481        | <0.001  |
| Substrate                    | 1   | 2.103        | 2.1026    | 8.587    | 0.03625        | <0.001  |
| Depth                        | 1   | 4.236        | 4.2363    | 17.301   | 0.07303        | <0.001  |
| Location                     | 6   | 5.744        | 0.9574    | 3.9099   | 0.09902        | <0.001  |
| Tubulariidae                 | 1   | 6.352        | 6.3517    | 25.9399  | 0.10949        | <0.001  |
| Residuals                    | 141 | 34.525       | 0.2449    |          | 0.59516        |         |
| Total                        | 155 | 58.011       |           |          | 1              |         |

0.04. The total  $R^2$  of the formula was 0.40, resulting in a residual  $R^2$  of 0.60. The PERMANOVA on steel-only data showed a small significant ( $p < 0.01$ ) effect of age ( $R^2 = 0.02$ ) but not from cleaning ( $p = 0.48$ ,  $R^2 = 0.005$ ) on the community.

## Discussion

### Depth

The depth distribution of species richness clearly follows a non-linear pattern with maximum species richness at intermediate depths between 15 and 25 m (Figure 4). Similar patterns have been observed on other reefs, both temperate and tropical (Clarke and

Lidgard, 2000; Cornell and Karlson, 2000; van der Stap *et al.*, 2016). Depth had a high explanatory value (7% of the total variation) in the multivariate analysis. Although not specifically investigated here, the maximum richness at intermediate depth may be explained by the intermediate disturbance theory (IDT; Connell 1978). At intermediate disturbance, diversity is at its peak. Halfway the water column, disruption from wave action is lower than near the surface but higher than at the bottom. IDT is known from wave disturbance on shallow marine sites (England *et al.*, 2008) and was also suggested by van der Stap *et al.* (2016) as the main explanation for higher species richness at intermediate depths on offshore platforms.

### Age and location

The univariate models did not show a significant effect of age on species richness. Although the platforms were all older than the PAWF foundations and total observed and predicted richness on the combined platforms were higher, predicted richness in PAWF fell within the range of predicted richness of the individual platform locations. These results are in line with findings by *Wendt et al.* (1989), who found no significant differences in species richness among shipwrecks of different ages. Their subjects, however, differed <6.5 years in age. In contrast, our multivariate analyses showed a small but significant effect of age on species composition. *Whomersley and Picken* (2003) studied marine growth patterns on four offshore production platforms over a period of 11 years and observed large variations in percentage cover in the dominant species. This large variation may result in non-significant results when trying to detect trends. Epibenthic communities on wind farms in the southern North Sea had a yearly richness cycle, with lowest richness in spring and highest in summer (*De Mesel et al.*, 2015). This is in contrast with our results, showing a slight decrease from April followed by an increase in richness from July to October, although data outside this range were missing from our analysis. Short-term variation in richness may be much more important than long-term variation.

Beta diversity indicated that there is differentiation between the studied locations. Therefore, it is likely that the higher total richness on combined platforms was caused by the scattered geographical distribution of the platforms compared with the limited distribution in the PAWF. The MDS plot (*Figure 5*) confirms this, as a large part of the PAWF samples cluster while the platform samples show much larger variation on average.

### Key species

Some species are common on both natural and artificial reefs. *Metridium dianthus* and *Electra pilosa* are common on steel, rock dump and BRG rocks. The cosmopolitan *E. pilosa* (*Nikulina et al.*, 2007) is one of the few species that was present on both substrate types. *E. pilosa* is a common epibenthic species in the southern North Sea (*Jennings et al.*, 1999). It is often observed on artificial structures such as shipwrecks (*Schrieken et al.*, 2013; *Faasse et al.*, 2016) and oil platforms (*Forteach et al.*, 1984; *Beukhof et al.*, 2016). Species that are very common on steel but rare on the natural rocks are *Jassa herdmani*, *Mytilus edulis*, and *Stenothoe monoculoides*. These are all species that mostly occur at shallow or intermediate depths and are uncommon at the seabed around the artificial structures. Given that they are rare in rock samples, it is likely that these species are only present offshore due to artificial structures providing shallow habitat. Their presence at the rock dump around platforms is probably caused by *M. edulis* clumps falling off the structure (*Krone et al.*, 2013).

Tubulariid Hydrozoa were shown by *Zintzen et al.* (2007) to positively correlate with species richness on a shipwreck. Results reported here confirm this. Tubulariidae create complex, bush-like environments, giving shelter to other organisms. This is the most likely cause of the higher amount of species found in samples with these Hydrozoa. The sea anemone *Metridium dianthus* had been suggested to have a strong negative effect on species richness (*Coolen et al.*, 2015; *van der Stap et al.*, 2016), this was indicated by the current results, where high abundance of *M. dianthus* correlates with low species richness. The species has a

small effect on the community composition, shown by the PERMANOVA results, explaining 1% of the variation in the data.

The sea urchin *Psammechinus miliaris* had a positive correlation with species richness. This species consumes a wide variety of food sources (*Hughes*, 2006; *Kelly et al.*, 2013). *P. miliaris* is known to clear patches of steel-substrate epifouling (*Van Moorsel et al.*, 1989). Scraping of organisms by *P. miliaris* may increase heterogeneity in the local epifouling community by creating new settling opportunities for additional species.

Mussel *Mytilus edulis* showed a strong positive correlation with species richness in the univariate models. The structure of mussels, increasing local variation in surface orientation, is similar to that of gravelly reefs. *M. edulis* also provides secondary hard substrates, which augments biodiversity (*Gutierrez et al.*, 2003; *Norling and Kautsky*, 2008). Likewise, presence of *M. edulis* increases habitat heterogeneity in the Wadden Sea and thereby positively influences species richness and composition (*Drent and Dekker*, 2013).

### Rock vs. steel

Substrate type had only a small and insignificant effect on species richness but a significant effect on species composition. The effect varied between positive and negative in alternative models (*Table 4*). Although rocky substrate is much more complex than straight steel surfaces and its complexity can be positively related to species richness (*Johnson et al.*, 2003; *Kostylev et al.*, 2005), this was not apparent here.

### Artificial vs. natural reefs

The MDS shows a gradient from shallow steel to deeper laying natural reefs. No clear separation of substrate types is present. There is a clustering of rocks of artificial and natural origin with the most overlap with deeper steel from platforms. However, no strong differentiation between the natural and artificial substrates can be concluded from the MDS. This is in contrast to earlier studies which showed communities on artificial and natural reefs differed significantly (*Page et al.*, 2007; *Wilhelmsson and Malm*, 2008).

Non-indigenous species percentage was higher in the intertidal zone, which is in line with observations by *De Mesel et al.* (2015). Furthermore, native species that are uncommon offshore without intertidal structures were found on and around locations with intertidal zones. In case these species are unwanted, it is advisable for future RTR projects to remove the intertidal zone from abandoned installations in order to reduce the presence of intertidal species at offshore locations.

### Study limitations and recommendations for future studies

The study presented here has limitations that should be kept in mind when interpreting the results. The data were collected during studies that were carried out with different objectives. The locations studied were geographically separated. This should be improved in future research by including natural reefs in the proximity of the platforms, e.g. the reefs at the Texel Rough which are located between the L15-A and L10 platforms.

Some installations in the North Sea have concrete foundations. During the platform study we had the opportunity to observe footage of a concrete and a steel installation in close proximity. The dominant epibenthic species appeared to differ strongly.



We recommend concrete foundations to be included in future studies.

### Optimizing artificial reefs

When reefed or newly built structures are to be optimized to provide habitat to epibenthic species that would normally inhabit natural rocky reefs, we suggest to add as much rock dump or scour protection in various sizes around the structure as possible, to increase local habitat complexity. We advise to prevent intertidal zones where possible, e.g. by removing the intertidal zone from reefed structures, cutting them well below the water surface.

### Conclusion

In the Dutch part of the North Sea, there is a gradient in community differentiation from deep rocks to shallow steel. Variation in species richness correlates with depth and sampling month. Species richness is also positively correlated with abundance of *Mytilus edulis*, *Psammecinus miliaris*, and the presence of Tubulariidae. In contrast, *Metridium dianthus* abundance negatively correlates with richness. Adding additional rocky substrate around steel artificial structures is beneficial for epibenthic species that inhabit natural reefs.

### Supplementary data

Supplementary material is available at the ICESJMS online version of the manuscript.

### Acknowledgements

This work was supported by the Wageningen UR TripleP@Sea Innovation program under Grant KB-14-007; the Dutch Department of Economic Affairs under Grant KB-24-002-001; NWO Domin Applied and Engineering Sciences under Grant 14494; the Nederlandse Aardolie Maatschappij BV, Wintershall Holding GmbH, Energiebeheer Nederland B.V., and the oil and gas joint industry INSITE fund, through the RECON project. Part of the information contained here has been derived from data that were made available under the European Marine Observation Data Network (EMODnet) Seabed Habitats project (<http://www.emodnet-seabedhabitats.eu/>), funded by the European Commission's Directorate-General for Maritime Affairs and Fisheries (DG MARE). ENGIE Exploration and Production Nederland B.V. allowed and facilitated us to sample their installations and we are especially grateful to E. Schmidt, N. Kaarls, U. Sjöqvist, and M. Vrijenhoeff for their help arranging this cooperation. G. Menijn at ENGIE supplied information on rock dump around installations. Furthermore, we received help from the crew of the Seamar Splendid and the Bluestream dive team. A large number of students at Wageningen Marine Research processed samples in the laboratory. Geert Aarts, Sander Lagerveld, and Sander Glorius at Wageningen Marine Research advised on our data analysis and Robbert Jak reviewed our manuscript and provided useful comments. We thank all these persons and organizations for their help. We thank our anonymous reviewers for their help improving our manuscript.

### References

4C Offshore. 2016. Offshore wind farms. <http://www.4coffshore.com/windfarms/> (accessed 23 August 2016).  
Ahiaga-dagbui, D. D., Love, P. E. D., Whyte, A., and Boateng, P. 2017. Costing and technological challenges of offshore oil and gas

decommissioning in the UK North Sea. *Journal of Engineering and Construction Management*, 143: 05017008.  
Akaike, H. 1973. Information theory as an extension of the maximum likelihood principle. *In* Second International Symposium on Information Theory, pp. 267–281. Ed. by B. N. Petrov and F. Csaki. Akadémiai Kiadó, Budapest.  
Anderson, M. J. 2001. A new method for non-parametric multivariate analysis of variance. *Austral Ecology*, 26: 32–46.  
Anderson, M. J. 2005. PERMANOVA: A FORTRAN Computer Program for Permutational Multivariate Analysis of Variance. Department of Statistics, University of Auckland, Auckland, New Zealand. 24 pp.  
Ates, R. M. L. 2006. De golfbrekeranemoon, *Diadumene cincta* Stephenson, 1925, is geen recente immigrant. *Zeepaard*, 66: 52–58.  
Beukhof, E., Coolen, J. W. P., van der Weide, B. E., Cuperus, J., de Blauwe, H., and Lust, J. 2016. Records of five bryozoan species from offshore gas platforms rare for the Dutch North Sea. *Marine Biodiversity Records*, 9: 91.  
Bos, O. G., Gittenberger, A., Boois, I. J., de, A. M., van, Wal, J. T., van der, J., Cremer, B. H., van der. *et al.* 2017. Soortenlijst Nederlandse Noordzee. Wageningen University & Research Rapport C125/16A. Den Helder. 100 pp.  
Bray, J. R., and Curtis, J. T. 1957. An ordination of the upland forest communities of southern Wisconsin. *Ecological Monographs*, 27: 325–349.  
Burnham, K. P., and Anderson, D. R. 2004. Multimodel inference: understanding AIC and BIC in model selection. *Sociological Methods and Research*, 33: 261–304.  
Cattell, R. B. 1966. The Scree test for the number of factors. *Multivariate Behavioral Research*, 1: 245–276.  
Champely, S., Ekstrom, C., Dalgaard, P., Gill, J., Weibelzahl, S., Anandkumar, A., Ford, C. *et al.* 2017. pwr: basic functions for power analysis. <https://cran.r-project.org/package=pwr> (last accessed 10 January 2018).  
Chao, A. 1987. Estimating the population size for capture-recapture data with unequal catchability. *Biometrics*, 43: 783–791.  
Clarke, A., and Lidgard, S. 2000. Spatial patterns of diversity in the sea: bryozoan species richness the North Atlantic. *Journal of Animal Ecology*, 69: 799–814.  
Cleveland, W. S. 1985. *The Elements of Graphing Data*. Wadsworth Advanced Books and Software, Belmont, CA. 323 pp.  
Cohen, J. 1988. *Statistical Power Analysis for the Behavioral Sciences*. Lawrence Erlbaum Associates, New York. 567 pp.  
Connell, J. 1978. Diversity in tropical rain forests and coral reefs. *Science*, 199: 1302–1310.  
Coolen, J. W. P., Bos, O. G., Glorius, S., Lengkeek, W., Cuperus, J., Van der Weide, B. E., and Agüera, A. 2015. Reefs, sand and reef-like sand: a comparison of the benthic biodiversity of habitats in the Dutch Borkum Reef Grounds. *Journal of Sea Research*, 103: 84–92.  
Coolen, J. W. P., Lengkeek, W., Degraer, S., Kerckhof, F., Kirkwood, R. J., and Lindeboom, H. J. 2016. Distribution of the invasive *Caprella mutica* Schurin, 1935 and native *Caprella linearis* (Linnaeus, 1767) on artificial hard substrates in the North Sea: separation by habitat. *Aquatic Invasions*, 11: 437–449.  
Cornell, H. V., and Karlson, R. H. 2000. Coral species richness: ecological versus biogeographical influences. *Coral Reefs*, 19: 37–49.  
Day, M. D., and Gusmita, A. 2016. Decommissioning of offshore oil and gas installations. *In* Environmental Technology in the Oil Industry, pp. 257–283. Ed. by S. Orszulik. Springer International Publishing, Switzerland.  
De Mesel, I., Kerckhof, F., Norro, A., Rumes, B., and Degraer, S. 2015. Succession and seasonal dynamics of the epifauna community on offshore wind farm foundations and their role as stepping stones for non-indigenous species. *Hydrobiologia*, 756: 37–50.

- Dias, I. M., Spierings, M., Coolen, J. W. P., Van Der Weide, B., and Cuperus, J. 2017. First record of *Syllis vittata* (Polychaeta: Syllidae) in the Dutch North Sea. *Marine Biodiversity Records*, 10: 16.
- Dolmer, P. 1998. The interactions between bed structure of *Mytilus edulis* L. and the predator *Asterias rubens* L. *Journal of Experimental Marine Biology and Ecology*, 228: 137–150.
- Drent, J., and Dekker, R. 2013. Macrofauna associated with mussels, *Mytilus edulis* L., in the subtidal of the western Dutch Wadden Sea. NIOZ Report 2013-7. Texel, NL, 56 pp.
- Duineveld, G. C. a., Künitzer, A., Niermann, U., De Wilde, P. a W J., and Gray, J. S. 1991. The macrobenthos of the North Sea. *Journal of Sea Research*, 28: 53–65.
- EBN. 2014. Focus on Dutch Oil & Gas. EBN Report. Utrecht, NL, 56 pp.
- EMODnet. 2015. European Marine Observation Data Network (EMODnet) Seabed Habitats project. <http://www.emodnet-seabedhabitats.eu/> (accessed 1 August 2015).
- England, P. R., Phillips, J., Waring, J. R., Symonds, G., and Babcock, R. 2008. Modelling wave-induced disturbance in highly biodiverse marine macroalgal communities: support for the intermediate disturbance hypothesis. *Marine and Freshwater Research*, 59: 515.
- European Biodiversity data centre (BDC). 2016. European Nature Information System EUNIS. 8–2016. <http://eunis.eea.europa.eu/> (accessed November).
- European Commission 1992. Council Directive 92/43/EEC of 21 May 1992 on the conservation of natural habitats and of wild fauna and flora. *Official Journal of the European Communities*, 206: 7–50.
- EWEA. 2015. Wind energy scenarios for 2030. European Wind Energy Association Report, 1–8 pp.
- Faasse, M., Coolen, J. W. P., Gittenberger, A., and Schrieken, N. 2016. Nieuwe mosdiertjes van noordzeewrakken (Bryozoa). *Nederlandse Faunistische Mededelingen*, 46: 43–48.
- Fofonoff, P., Ruiz, G., Steves, B., Simkanin, C., and Carlton, J. 2017. *Monocorophium acherusicum*, <http://invasions.si.edu/nemesis/> (accessed 14 December 2017).
- Forteach, G. N. R., Picken, G. B., and Ralph, R. 1984. Patterns of macrofouling on steel platforms in the central and northern North Sea. *In Corrosion and Marine Growth of Offshore Structures*, pp. 10–23. Ed. by J. R. Lewis and A. D. Mercer. John Wiley & Sons, London, UK.
- Fowler, A. M., Macreadie, P. I., and Booth, D. J. 2015. Renewables-to-reefs: participatory multicriteria decision analysis is required to optimize wind farm decommissioning. *Marine Pollution Bulletin*, 98: 368–371.
- Gittenberger, A., Rensing, M., Stegenga, H., and Hoeksema, B. 2010. Native and non-native species of hard substrata in the Dutch Wadden Sea. *Nederlandse Faunistische Mededelingen*, 33: 21–76.
- Gutierrez, J. L., Jones, C. G., Strayer, D. L., and Iribarne, O. O. 2003. Mollusks as ecosystem engineers: the role of shell production in aquatic habitats. *Oikos*, 101: 79–90.
- Herbert, R. J. H., Collins, K., Mallinson, J., Hall, A. E., Pegg, J., Ross, K., Clarke, L. *et al.* 2017. Epibenthic and mobile species colonisation of a geotextile artificial surf reef on the south coast of England. *PLoS One*, 12: e0184100–e0184128.
- Holstein, J. 2017. worms: retrieving Aphia Information from World Register of Marine Species. R Package Version 0.2.1, <https://cran.r-project.org/package=worms> (last accessed 21 September 2017).
- Hughes, A. D. 2006. The Trophic Ecology of *Psammecinus Miliaris* in Scottish Sea Lochs. Open University, Inverness, UK. 159 pp.
- Jennings, S., Lancaster, J., Woolmer, A., and Cotter, J. 1999. Distribution, diversity and abundance of epibenthic fauna in the North Sea. *Journal of the Marine Biological Association of the U.K.*, 79: 385–399.
- Johnson, M. P., Frost, N. J., Mosley, M. W. J., Roberts, M. F., and Hawkins, S. J. 2003. The area-independent effects of habitat complexity on biodiversity vary between regions. *Ecology Letters*, 6: 126–132.
- Kaplan, S. W. 1984. The association between the sea anemone *Metridium senile* and the mussel *Mytilus edulis* reduces predation by the starfish *Asterias forbesii*. *Marine Biology Association*, 79: 155–157.
- Kelly, M. S., Hughes, A. D., and Cook, E. J. 2013. *Psammecinus miliaris*. *In Sea Urchins: Biology and Ecology*, pp. 329–336. Ed. by J. M. Lawrence. Elsevier, Amsterdam, The Netherlands.
- Korringa, P. 1954. The shell of *Ostrea edulis* as a habitat. *Archives Néerlandaises de Zoologie*, 10: 32–146.
- Kostylev, V. E., Erlandsson, J., Mak, Y. M., and Williams, G. A. 2005. The relative importance of habitat complexity and surface area in assessing biodiversity: fractal application on rocky shores. *Ecological Complexity*, 2: 272–286.
- Krone, R., Gutow, L., Joschko, T. J., and Schröder, A. 2013. Epifauna dynamics at an offshore foundation-implications of future wind power farming in the North Sea. *Marine Environmental Research*, 85: 1–12.
- Leewis, R. J. V., Moorsel, G. W. N. M., and Waardenburg, H. W. 2000. Shipwrecks on the Dutch continental shelf as artificial reefs. *In Artificial Reefs in European Seas*, pp. 419–434. Ed. by A. C. Jensen, K. J. Collins, and A. P. M. Lockwood. Kluwer Academic Publishers, Dordrecht, The Netherlands.
- Lengkeek, W., Coolen, J. W. P., Gittenberger, A., and Schrieken, N. 2013. Ecological relevance of shipwrecks in the North Sea. *Nederlandse Faunistische Mededelingen*, 40: 49–58.
- Leonhard, S. B., and Christensen, J. 2006. Benthic communities at horns rev before, during and after construction of horns rev offshore annual report 2005. Bio/Consult as Report. Denmark, 134 pp.
- Lettns, J. 2015. Wrecksite. <http://www.wrecksite.eu> (accessed 7 April 2015).
- Macreadie, P. I., Fowler, A. M., and Booth, D. J. 2012. Rigs-to-reefs policy: can science trump public sentiment? *Frontiers in Ecology and the Environment*, 10: 179–180.
- Menge, B. A., and Sutherland, J. P. 1976. Species diversity gradients: synthesis of the roles of predation, competition, and temporal heterogeneity. *The American Naturalist*, 110: 351–369.
- Mills, L. S., Soulé, M. E., and Doak, D. F. 1993. The keystone-species concept in ecology and conservation, management and policy must explicitly consider the complexity of interactions in natural systems. *BioScience*, 43: 219–224.
- Ministry of Infrastructure and Environment—Directorate-General Rijkswaterstaat. 2015. Fairway Information Services. <http://www.vaarweginformatie.nl/fdd/main/infra/downloads> (accessed 20 August 2015).
- Moura, A., Da Fonseca, L. C., Cúdia, J., Carvalho, S., Boaventura, D., Cerqueira, M., Leitão, F. *et al.* 2008. Is surface orientation a determinant for colonisation patterns of vagile and sessile macrobenthos on artificial reefs? *Biofouling*, 24: 381–391.
- Nelson, M. L., and Craig, S. F. 2011. Role of the sea anemone *Metridium senile* in structuring a developing subtidal fouling community. *Marine Ecology Progress Series*, 421: 139–149.
- Nikulina, E. A., Hanel, R., and Schäfer, P. 2007. Cryptic speciation and paraphyly in the cosmopolitan bryozoan *Electra pilosa* - Impact of the Tethys closing on species evolution. *Molecular Phylogenetics and Evolution*, 45: 765–776.
- Noordzeeloket. 2016. Olie- en gaswinning. <https://www.noordzeeloket.nl/functies-en-gebruik/oliewinning-en-gaswinning/> (last accessed 1 July 2017).
- Norling, P., and Kautsky, N. 2008. Patches of the mussel *Mytilus* sp. are islands of high biodiversity in subtidal sediment habitats in the Baltic Sea. *Aquatic Biology*, 4: 75–87.
- Oksanen, A. J., Kindt, R., Legendre, P., Hara, B. O., Simpson, G. L., Stevens, M. H. H., and Wagner, H. 2008. The vegan package; Community Ecology Package (Version 1.15-1). <https://>

- //CRAN.R-project.org/package=vegan (last accessed 1 January 2017).
- Page, H. M., Dugan, J. E., Schroeder, D. M., Nishimoto, M. M., Love, M. S., and Hoesterey, J. C. 2007. Trophic links and condition of a temperate reef fish: comparisons among offshore oil platform and natural reef habitats. *Marine Ecology Progress Series*.
- Paine, R. T. 1969. A note on trophic complexity and community stability. *The American Naturalist*, 103: 91–93.
- Picken, G. B., and McIntyre, A. 1989. Rigs to reefs in the North Sea. *Bulletin of Marine Science*, 44: 782–788.
- R Core Team. 2016. R: A language and environment for statistical computing (Version 3.3.0). R Foundation for Statistical Computing, Vienna, Austria.
- Royal Academy of Engineering. 2013. Decommissioning in the North Sea Decommissioning in the North Sea: A report of a workshop held to discuss the decommissioning of oil and gas platforms in the North Sea, 15 pp.
- RStudio Team. 2015. RStudio: Integrated development environment for R (Version 0.99.486). RStudio, Inc., Boston, MA. <http://www.rstudio.com/>.
- Sarkar, D. 2008. *Lattice Multivariate Data Visualization with R*. Springer, New York. 283 pp. <http://lmdvr.r-forge.r-project.org>.
- Schrieken, N., Gittenberger, A., Coolen, J. W. P., and Lengkeek, W. 2013. Marine fauna of hard substrata of the Cleaver Bank and Dogger Bank. *Nederlandse Faunistische Mededelingen*, 41: 69–78.
- Shepard, R. N., Romney, A. K., Kimball, A., and Nerlove, S. 1972. *Multidimensional Scaling: Theory and Application in the Behavioral Sciences: I. Theory*. Academic Press, New York. 261 pp.
- Shepherd, M. 2015. *Oil Strike North Sea: A First Hand History of North Sea Oil*. Luath Press Ltd, Edinburgh, UK. 208 pp.
- Smyth, K., Christie, N., Burdon, D., Atkins, J. P., Barnes, R., and Elliott, M. 2015. Renewables-to-reefs? – Decommissioning options for the offshore wind power industry. *Marine Pollution Bulletin*, 90: 247–258.
- Sørensen, T. 1948. A method of establishing groups of equal amplitude in plant sociology based on similarity of species and its application to analyses of the vegetation on Danish commons. *Kongelige Danske Videnskabernes Selskab*, 5: 1–34.
- Southward, A. J. 2008. *Linnean Society of London and the Estuarine and Coastal Sciences Association, 140. Barnacles: Keys and Notes for the Identification of British Species*. Shrewsbury England. 140 pp.
- Spierings, M., Dias, I. M., Coolen, J. W. P., Van Der Weide, B., and Cuperus, J. 2017. First record of *Harmothoe aspera* (Hansen, 1879) (Polychaeta: Polynoidea) in the Dutch North Sea. *Marine Biodiversity Records*, 10: 4.
- van der Stap, T., Coolen, J. W. P., and Lindeboom, H. J. 2016. Marine fouling assemblages on offshore gas platforms in the southern North Sea: effects of depth and distance from shore on biodiversity. *PLoS One*, 11: e0146324.
- van der Weide, H. 2008. Wrakkeneldorado in de Noordzee? Ontzenuwing van een mythe. *Duiken*, 9: 27–29.
- Van Moorsel, G. W. N. M. 2003. *Ecologie van de Klaverbank*. BiotaSurvey 2002. Ecosub Report. Doorn, 157 pp.
- Van Moorsel, G. W. N. M., Sips, H. J. J., and Waardenburg, H. W. 1989. *De fauna op en rond wrakken in de Noordzee in 1988*. Bureau Waardenburg Report November 1989. Bureau Waardenburg bv, Culemborg, NL.
- Vanagt, T., and Faasse, M. 2014. 106. Development of hard substratum fauna in the Princess Amalia Wind Farm. Monitoring six years after construction. eCOAST report 2013009. Oostende, Belgium. 106 pp.
- Vanagt, T., Van de Moortel, L., and Faasse, M. A. 2013. Development of hard substrate fauna in the Princess Amalia Wind Farm. eCOAST report 2011036. Oostende, Belgium, 42 pp.
- Walker, S. J., and Schlacher, T. A. 2014. Limited habitat and conservation value of a young artificial reef. *Biodiversity and Conservation*, 23: 433–447.
- Wendt, P. H., Knott, D. M., and Van Dolah, R. F. 1989. Community structure of the sessile biota on five artificial reefs of different ages. *Bulletin of Marine Sciences*, 44: 1106–1122.
- Whomersley, P., and Picken, G. B. 2003. Long-term dynamics of fouling communities found on offshore installations in the North Sea. *Journal of the Marine Biological Association of the U.K.*, 83: 897–901.
- Wilhelmsson, D., and Malm, T. 2008. Fouling assemblages on offshore wind power plants and adjacent substrata. *Estuarine Coastal and Shelf Science*, 79: 459–466.
- Wood, S. N. 2011. Fast stable restricted maximum likelihood and marginal likelihood estimation of semiparametric generalized linear models. *Journal of the Royal Statistical Society (B)*, 73: 3–36.
- World Register of Marine Species. 2015. *AphiaID Name Service*. <http://www.marinespecies.org/aphia.php?p=soap#> (accessed 19 November 2015).
- WoRMS Editorial Board. 2017. *World Register of Marine Species*. <http://www.marinespecies.org> (accessed 4 December 2017).
- Zintzen, V., and Massin, C. 2010. Artificial hard substrata from the Belgian part of the North Sea and their influence on the distributional range of species. *Belgian Journal of Zoology*, 140: 20–29.
- Zintzen, V., Norro, A., Massin, C., and Mallefet, J. 2007. Temporal variation of *Tubularia indivisa* (Cnidaria, Tubulariidae) and associated epizoots on artificial habitat communities in the North Sea. *Marine Biology*, 153: 405–420.
- Zuur, A. F., Ieno, E. N., and Elphick, C. S. 2010. A protocol for data exploration to avoid common statistical problems. *Methods in Ecology and Evolution*, 1: 3–14.

Handling editor: Joanna Norkko
